# Supplementary material
Source: publisher figshare collection journal article supplement (https://tandf.figshare.com/articles/dataset/_/7937843)
Supplement: Supplementary file [file 1]

**Table S2: Means of ZIKV titers for transmission at 6, 9, 14 and 21 days post-infection for the different studied viruses.**

| Day post infect <sup>o</sup> |    |      |             | 6 dpi                                                                      |                  |             | 9 dpi |                  |             | 14 dpi |                  |             | 21dpi            |  |  | P-value |
|------------------------------|----|------|-------------|----------------------------------------------------------------------------|------------------|-------------|-------|------------------|-------------|--------|------------------|-------------|------------------|--|--|---------|
| Virus                        | n  | mean | 95%CI       | n                                                                          | mean             | 95%CI       | n     | mean             | 95%CI       | n      | mean             | 95%CI       |                  |  |  |         |
| <b>Asian Lineage</b>         |    |      |             | <b>Transmission (number of infected saliva / number of infected heads)</b> |                  |             |       |                  |             |        |                  |             |                  |  |  |         |
| NC-2014-843                  | 8  | 0.00 | --          | 6                                                                          | 0.00             | --          | 9     | 0.00             | --          | 14     | 0.00             | --          | --               |  |  |         |
| NC-2014-5132                 | -- | NT   | --          | 3                                                                          | 0.00             | --          | 5     | 0.00             | --          | --     | NT               | --          | --               |  |  |         |
| NC-2015-2391                 | 10 | 0.12 | [0.00-0.37] | 6                                                                          | 0.09             | [0.00-0.29] | 14    | 0.13             | [0.00-0.33] | 25     | 0.06             | [0.00-0.15] | 0.93             |  |  |         |
| SA-2016-18246                | 8  | 0.00 | --          | 3                                                                          | 0.00             | --          | 18    | 0.00             | --          | 15     | 0.21             | [0.00-0.46] | <b>0.01</b>      |  |  |         |
| <b>African Lineage</b>       |    |      |             |                                                                            |                  |             |       |                  |             |        |                  |             |                  |  |  |         |
| AF-1947-MR766                | -- | NT   | --          | 27                                                                         | 1.44             | [0.76-2.12] | 22    | 1.04             | [0.49-1.59] | 27     | 0.97             | [0.48-1.47] | 0.59             |  |  |         |
| AF-1991-HD78788              | 22 | 0.22 | [0.01-0.43] | 22                                                                         | 1.01             | [0.44-1.58] | 29    | 2.15             | [1.56-2.74] | 16     | 1.64             | [0.95-2.33] | <b>&lt;0.001</b> |  |  |         |
| AF-2002-ArD 165 522          | 15 | 0.13 | [0.00-0.40] | 19                                                                         | 0.14             | [0.00-0.35] | 16    | 0.13             | [0.00-0.31] | 17     | 0.25             | [0.00-0.56] | 0.80             |  |  |         |
| P-value                      |    | 0.06 |             |                                                                            | <b>&lt;0.001</b> |             |       | <b>&lt;0.001</b> |             |        | <b>&lt;0.001</b> |             |                  |  |  |         |
