# Supplementary material
Source: publisher figshare collection journal article supplement (https://tandf.figshare.com/articles/dataset/_/7937843)
Supplement: Supplementary file [file 1]

**Table S1: Positivity rates of infection, dissemination and transmission at 6, 9, 14 and 21 days post-infection for the ZIKV tested in this study.**

| Day post infect°    | 6 dpi                                                                |          |       | 9 dpi  |          |       | 14 dpi |          |       | 21dpi  |          |       |         |
|---------------------|----------------------------------------------------------------------|----------|-------|--------|----------|-------|--------|----------|-------|--------|----------|-------|---------|
| Virus               | n                                                                    | Positive | (%)   | n      | Positive | (%)   | n      | Positive | (%)   | n      | Positive | (%)   | P-value |
| Asian Lineage       | Infection (Number of infected bodies / number of mosquitoes tested)  |          |       |        |          |       |        |          |       |        |          |       |         |
| NC-2014-843         | 30                                                                   | 17       | (57)  | 30     | 19       | (63)  | 30     | 28       | (93)  | 30     | 28       | (93)  | <0.001  |
| NC-2014-5132        | --                                                                   | NT       | --    | 26     | 9        | (35)  | 30     | 25       | (83)  | --     | NT       | --    | <0.001  |
| NC-2015-2391        | 30                                                                   | 22       | (73)  | 30     | 25       | (83)  | 29     | 25       | (86)  | 45     | 39       | (87)  | 0.47    |
| SA-2016-18246       | 30                                                                   | 20       | (67)  | 30     | 26       | (87)  | 29     | 26       | (90)  | 25     | 24       | (96)  | 0.02    |
| African Lineage     |                                                                      |          |       |        |          |       |        |          |       |        |          |       |         |
| AF-1947-MR766       | --                                                                   | NT       | --    | 30     | 30       | (100) | 30     | 30       | (100) | 30     | 30       | (100) | --      |
| AF-1991-HD78788     | 30                                                                   | 27       | (90)  | 30     | 23       | (77)  | 30     | 29       | (97)  | 21     | 20       | (95)  | 0.09    |
| AF-2002-ArD 165 522 | 30                                                                   | 30       | (100) | 30     | 30       | (100) | 30     | 28       | (93)  | 30     | 28       | (93)  | 0.32    |
| P-value             | <0.001                                                               |          |       | <0.001 |          |       | 0.19   |          |       | 0.36   |          |       |         |
| Asian Lineage       | Dissemination (number of infected heads / number of infected bodies) |          |       |        |          |       |        |          |       |        |          |       |         |
| NC-2014-843         | 17                                                                   | 8        | (47)  | 19     | 6        | (32)  | 28     | 9        | (32)  | 28     | 14       | (50)  | 0.15    |
| NC-2014-5132        | --                                                                   | NT       | --    | 9      | 3        | (33)  | 25     | 5        | (20)  | --     | NT       | --    | 0.71    |
| NC-2015-2391        | 22                                                                   | 10       | (45)  | 25     | 6        | (24)  | 25     | 14       | (56)  | 39     | 25       | (64)  | 0.01    |
| SA-2016-18246       | 20                                                                   | 8        | (40)  | 26     | 3        | (12)  | 26     | 18       | (69)  | 24     | 15       | (63)  | <0.001  |
| African Lineage     |                                                                      |          |       |        |          |       |        |          |       |        |          |       |         |
| AF-1947-MR766       | --                                                                   | NT       | --    | 30     | 27       | (90)  | 30     | 22       | (73)  | 30     | 27       | (90)  | 0.15    |
| AF-1991-HD78788     | 27                                                                   | 22       | (81)  | 23     | 22       | (96)  | 29     | 29       | (100) | 20     | 16       | (80)  | 0.04    |
| AF-2002-ArD 165 522 | 30                                                                   | 15       | (50)  | 30     | 19       | (63)  | 28     | 16       | (57)  | 28     | 17       | (61)  | 0.79    |
| P-value             | <0.001                                                               |          |       | <0.001 |          |       | <0.001 |          |       | 0.004  |          |       |         |
| Asian Lineage       | Transmission (number of infected saliva / number of infected heads)  |          |       |        |          |       |        |          |       |        |          |       |         |
| NC-2014-843         | 8                                                                    | 0        | (0)   | 6      | 0        | (0)   | 9      | 0        | (0)   | 14     | 0        | (0)   | --      |
| NC-2014-5132        | --                                                                   | NT       | --    | 3      | 0        | (0)   | 5      | 0        | (0)   | --     | NT       | --    | --      |
| NC-2015-2391        | 10                                                                   | 1        | (10)  | 6      | 1        | (17)  | 14     | 2        | (14)  | 25     | 2        | (8)   | 0.84    |
| SA-2016-18246       | 8                                                                    | 0        | (0)   | 3      | 0        | (0)   | 18     | 0        | (0)   | 15     | 3        | (20)  | 0.01    |
| African Lineage     |                                                                      |          |       |        |          |       |        |          |       |        |          |       |         |
| AF-1947-MR766       | --                                                                   | NT       | --    | 27     | 13       | (48)  | 22     | 11       | (50)  | 27     | 12       | (44)  | 0.96    |
| AF-1991-HD78788     | 22                                                                   | 4        | (18)  | 22     | 11       | (50)  | 29     | 21       | (72)  | 16     | 13       | (81)  | <0.001  |
| AF-2002-ArD 165 522 | 15                                                                   | 1        | (7)   | 19     | 2        | (11)  | 16     | 2        | (13)  | 17     | 3        | (18)  | 0.95    |
| P-value             | 0.09                                                                 |          |       | <0.001 |          |       | <0.001 |          |       | <0.001 |          |       |         |
